18 **ABSTRACT**

19

20 Life history theory provides a framework for understanding how trade-offs  
21 generate negative trait associations. Among nestling birds, developmental rate, risk of  
22 predation, and lifespan covary, but some associations are only found within species  
23 while others are only observed between species. A recent comparative study suggests  
24 that allocation trade-offs may be alleviated by disinvestment in ephemeral traits, such  
25 as nest-grown feathers, that are quickly replaced. However, direct resource allocation  
26 trade-offs cannot be inferred from inter-specific trait-associations without  
27 complementary intra-specific studies. Here, we asked whether there is evidence for a  
28 within-species allocation trade-off between feather quality and developmental speed in  
29 tree swallows (*Tachycineta bicolor*). Consistent with the idea that ephemeral traits are  
30 deprioritized, nest-grown feathers had lower barb density than adult feathers.  
31 However, despite substantial variation in fledging age among nestlings, there was no  
32 evidence for a negative association between developmental pace and feather quality.  
33 Furthermore, accounting for differences in resource availability by considering  
34 provisioning rate and a nest predation treatment did not reveal a trade-off that was  
35 masked by variation in resources. Our results are most consistent with the idea that the  
36 inter-specific association between development and feather quality arises from adaptive  
37 specialization, rather than from a direct allocation trade-off.

38

39 **Keywords:** plumage quality, trade-off, developmental time, resource allocation

40

41

42 **INTRODUCTION**

43

44           Understanding the co-expression patterns of ecologically important traits is a  
45 primary goal of evolutionary ecology and life history evolution (Stearns 1992; Roff 2002;  
46 Agrawal 2020). Theory suggests that trade-offs between different traits should be most  
47 pronounced during periods of high demand or low resource availability (van  
48 Noordwijk and de Jong 1986). For altricial birds, the early growth period presents a  
49 particularly severe challenge, as nestlings must grow quickly to escape the nest and the  
50 associated risk of predation while simultaneously developing morphological traits and  
51 physiological systems that are critical for lifetime performance (Martin 1995; Martin et  
52 al. 2011). Within species, growth rate and time spent in the nest are related to nest  
53 predation rates and reduced adult survival, suggesting a resource allocation trade-off  
54 (Metcalf and Monaghan 2003; LaManna and Martin 2016). However, while the  
55 relationship between growth and predation risk is also seen in inter-specific  
56 comparisons (Bosque and Bosque 1995; Martin 1995; Remeš and Martin 2002), the  
57 relationship between growth rate and adult survival is not (Martin et al. 2015).  
58 Understanding when negative trait associations are similar at different scales (e.g.,  
59 within- versus between-species) and when those associations occur only at one level,  
60 will require a better understanding of the mechanisms that generate these patterns.

61           Comparative studies of trade-offs have the advantage of being potentially less  
62 influenced by the masking effects of between-individual variation in resource  
63 availability (van Noordwijk and de Jong 1986; Reznick et al. 2000). However, they also  
64 have the disadvantage that the same pattern of inter-specific trait associations can arise  
65 by more than one generating mechanism (Figure 1); without complementary intra-  
66 specific studies it will often be impossible to distinguish between these possibilities. For  
67 example, an apparent trade-off (negative trait association) between species could arise

68 because of a strong constraint resulting in a resource allocation trade-off within each  
69 individual of each species, or it could arise due to a “strategic trade-off” resulting from  
70 niche specialization or biotic interactions that differ between species. While both of  
71 these patterns are often referred to as trade-offs, the mechanism differs (Agrawal 2020).  
72 Understanding how and when trait associations translate across scales—from  
73 individuals to populations to species—requires both strengthening the scale-dependent  
74 predictive framework (reviewed in Agrawal, 2020) and empirical studies that  
75 investigate the same trait associations at different scales.

76 In the case of nestling growth, Callan et al. (2019) hypothesized that the apparent  
77 difference between the growth and adult survival trade-off in comparative versus single  
78 species studies might be explained by differences in relative investment in ephemeral  
79 traits that contribute relatively little to fitness. They focus in particular on the growth of  
80 body feathers in the nest because these feathers are often of lower quality than adult  
81 feathers and are replaced shortly after fledging (Rohwer et al. 2005; Butler et al. 2008).  
82 Thus, these nest-grown feathers may be relatively unimportant for long term  
83 performance and disinvesting in their quality in the nest could ameliorate an otherwise  
84 more severe trade-off between growth rate and adult survival. However, Agrawal  
85 (2020) argues that negative trait associations often arise between species through  
86 adaptive specialization and natural selection even when no direct resource allocation  
87 link exists between the two traits; thus inter-specific analysis alone is insufficient to  
88 infer within-species trade-offs. In fact, the inter-specific pattern described in Callan et al.  
89 (2019) could result from four distinct intra-specific patterns that imply different  
90 mechanisms operating at the within-species level (illustrated in Figure 1).

91 Here, we replicated the comparative analyses of Callan et al. (2019a) within a  
92 single species—tree swallows (*Tachycineta bicolor*)—to ask whether the correlation

93 between developmental speed and feather quality arises due to a direct resource  
94 allocation trade-off. Tree swallow nestlings vary considerably in the exact age of  
95 fledging and in the pace of development, even under similar ecological conditions.  
96 While nest-grown feathers are quickly molted after fledging, they likely play an  
97 important role in thermoregulation for young nestlings, and thermoregulation alone  
98 can account for up to a third of all metabolized energy in altricial young (Weathers and  
99 Sullivan 1991). Cold snaps are also a major source of mortality in developing tree  
100 swallows (Shiple et al. 2020) and feather development in the nest may be particularly  
101 important in this species. On the other hand, although predation rates are relatively low  
102 in tree swallows, predation is still a common source of mortality, including in our study  
103 population (Winkler et al. 2020a), and longer development periods lead to an extended  
104 period of risk. Thus, it is plausible that a direct resource allocation trade-off could  
105 operate on investment in nest-grown feather quality for thermoregulation versus rapid  
106 development for predator avoidance.

107 To test for this trade-off, we measured both feather quality and indicators of  
108 developmental rate (mass, wing length, and structural size) in nestling tree swallows.  
109 We used a network of automated sensors at each nest to determine the exact age of  
110 fledging for each individual nestling. When working at the intraspecific level, resource  
111 allocation trade-offs can be masked by variation in resource acquisition (see discussion  
112 above; van Noordwijk and de Jong 1986). Thus, we accounted for variation in resource  
113 availability in several ways. First, the sensor network provided detailed data on  
114 parental provisioning to ask whether the detectability of trade-offs depended on food  
115 availability. Second, we took advantage of ongoing experiments in this population that  
116 involved experimental predator treatments, which allowed us to assess whether any  
117 trade-offs between development and feather quality differed in an environment with

118 high perceived predation risk. Finally, we cross-fostered eggs at each nest before  
119 hatching. While cross-fostering was not strictly necessary to test for the trade-off of  
120 interest, the ability to flexibly adjust resources during development is a prerequisite of  
121 the within-individual trade-off being studied, and cross-fostering allowed us to  
122 estimate the extent to which genetic versus environmental effects influenced feather  
123 quality.

124         If the inter-specific association between developmental speed and feather quality  
125 results from a resource allocation trade-off that plays out within individuals of each  
126 species, then we expected to find an intra-specific association within tree swallows that  
127 paralleled the results of Callan et al.'s (2019) comparative study. Specifically, we  
128 expected that individual nestlings that fledged at younger ages would pay a cost, as  
129 indicated by lower quality nest-grown feathers. Furthermore, we predicted that this  
130 trade-off would be most pronounced in nests with either experimentally increased  
131 perceived predation pressure or naturally lower parental provisioning rates (*sensu* van  
132 Noordwijk & de Jong, 1986). Alternatively, if the inter-specific association arises due to  
133 strategic differences in developmental programs as a result of natural selection—rather  
134 than a strict resource allocation trade-off—then we would not expect to find a direct  
135 trade-off between developmental rate and feather quality within tree swallows.

136

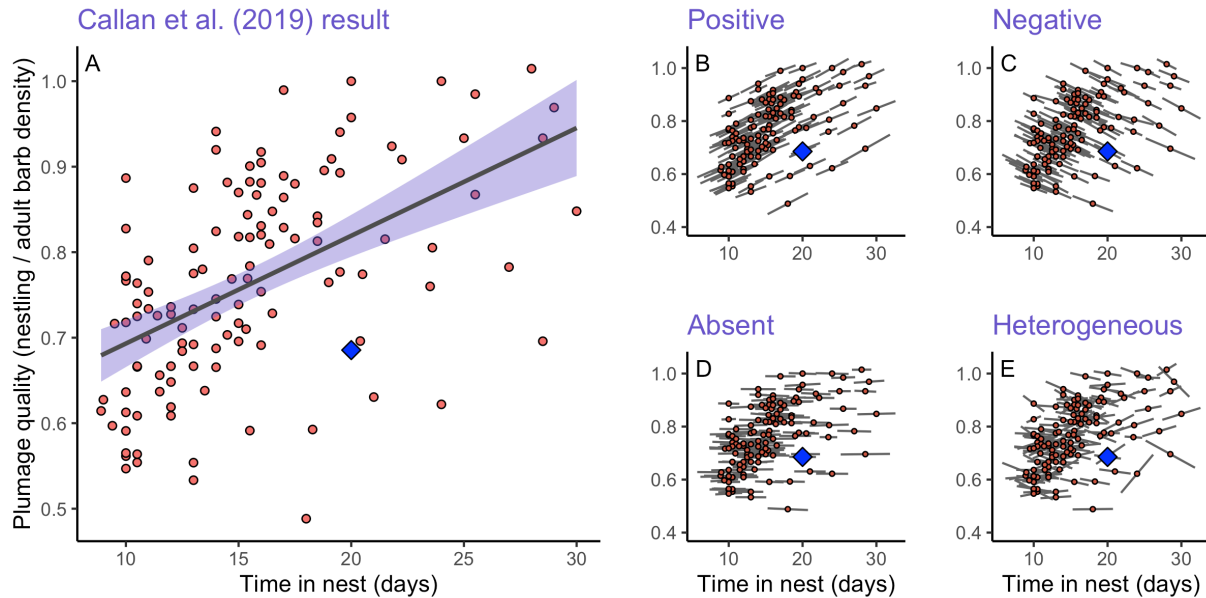

137

138 **Figure 1.** The between-species tradeoff reported in Callan et al 2019 (panel A; redrawn from publicly archived data: Callan et al.  
139 2019b) could result from four distinct underlying within species patterns. We used the same mean species points to illustrate  
140 hypothetical within species patterns that are positive (B), negative (C), absent (D), or heterogeneous between species (E). These  
141 relationships are intended to illustrate the scaling problem when moving from between to within-species inferences and are not  
142 based on any biological information about each species shown. In all panels, the value for tree swallows is the large blue diamond.

143

## 144 **METHODS**

145

### 146 *General Field Methods*

147

148 We studied tree swallows breeding near Ithaca, New York, USA in 2018 and 2019  
149 (42.503° N, 76.437° W). During each breeding season (May to July), we monitored every  
150 nest at the field sites following established protocols for this long-studied tree swallow  
151 population (Winkler et al. 2020b). Briefly, each nest box was checked every other day  
152 early in the season to determine clutch initiation and clutch completion date to within  
153 one day. Around the expected hatching date, we checked boxes every day so that an  
154 exact hatch date could be recorded.

155 Adults at each nest were captured 1-3 times during incubation or provisioning.  
156 At the first capture for each adult, we took morphological measurements (mass,  
157 flattened wing-chord length, and head + bill length), a blood sample for paternity, and  
158 6-8 feathers from two body regions—the center of the white breast and the rump just  
159 above the tail—to measure barb density (see below). For individuals that were not  
160 already banded from a previous year, we applied an aluminum USGS band and a  
161 passive integrated transponder (PIT) tag that encoded a unique 10-digit hexadecimal  
162 string.

163 Most nests in these two years were part of an experiment that involved targeted  
164 manipulations of adult females. While these manipulations were not designed to have  
165 any direct effects on nestlings, they may have had indirect effects on nestling resource  
166 availability or developmental environment by changing adult provisioning rates,  
167 reproductive investment, or antipredator behavior. Therefore, we conducted post-hoc  
168 comparisons between nestlings raised in different treatment groups to ask whether  
169 adult treatments influenced nestling trade-offs between development and feather  
170 quality via changes in resource availability or perceived environmental risk.

171 The most relevant treatment for the purposes of this study involved 2-3  
172 simulated predation events using a taxidermied mink (*Neovison vison*), a common  
173 predator of tree swallows, that occurred shortly before (2018) or shortly after (2019)  
174 hatching. In 2018, some females were subject to a challenge treatment that involved a  
175 handicapping manipulation where 3 feathers on each wing were bound together with a  
176 small plastic zip tie for approximately 5 days late in incubation, thereby reducing flight  
177 efficiency and female foraging ability (described in Taff et al. 2019b). Finally, females  
178 received a social signal manipulation (dulling or sham control of the white breast) in  
179 each year (for details of plumage manipulation, see Taff et al. In Pressa). For both the



180 signal manipulation and challenges, we assumed that any effects on nestlings would  
181 primarily occur through altered resources due to provisioning rates, and we therefore  
182 analyzed provisioning rates directly from radio-frequency identification (hereafter  
183 RFID) records. For the challenge treatments, we also fit models that included the  
184 categorical treatments directly as predictors because there is evidence that perceived  
185 predation risk can alter developmental trade-offs, independently of its effects on  
186 resource availability (e.g., Clinchy et al. 2013; LaManna and Martin 2016).

187

### 188 *Cross-Fostering and Nestling Measurements*

189

190 One of the goals of this study was to determine the degree to which  
191 environmental conditions versus genetic contributions drove differences in feather  
192 quality and nestling development. Therefore, we cross fostered eggs from each nest  
193 before incubation began so that any contribution to nestling feather development  
194 driven by developmental environment (e.g., incubation, provisioning rate) was  
195 decoupled from genetic inheritance or maternal effects associated with investment in  
196 the egg contents.

197 We paired nests based on timing of clutch initiation and on day 4 of egg laying  
198 we swapped half of the brood between the pair and marked all eggs in each nest with a  
199 pencil on the bottom of each egg. At half of the nests, we returned on the following day  
200 and swapped the 5<sup>th</sup> (unmarked) egg between the two nests. This two-step process  
201 ensured that some eggs from early and late in the laying order were swapped in case  
202 there were differences in yolk contents associated with laying order. In cases where  
203 there was not an appropriate nest to swap, we sometimes paired three nests together for

204 cross fostering. A few late season nests did not have any compatible pairs and were not  
205 cross fostered.

206 We banded nestlings when they were 12 days old, collected a blood sample for  
207 paternity assignment, and took morphological measurements (mass, wing length, and  
208 head + bill length). When nestlings were 15 days old, we once again took a mass  
209 measurement, applied a unique PIT tag, and collected feathers exactly as described  
210 above for adults to measure barb density. After day 15 we avoided visiting the nest to  
211 prevent forced fledging. Final nestling fate and exact fledging date were determined  
212 using RFID records and a check of the nest on day 24 to find any nestlings that had died  
213 in the nest after day 15.

214

#### 215 *RFID Sensor Network*

216

217 We installed an RFID system at each nest box in the study no later than day 4 of  
218 incubation (as in Vitousek et al. 2018). The system consisted of an RFID board held in a  
219 waterproof container on the bottom of the nest box (Bridge and Bonter 2011), an  
220 antenna that circled the nest box entrance, and a 12-volt battery that powered the  
221 system. We programmed the readers to record PIT tags within range (~2 cm) of the  
222 entrance hole every second from 5am to 10pm each day of the breeding season. From  
223 raw RFID records, we extracted female and—when possible—male provisioning rates  
224 at each nest following the algorithm described in Vitousek et al. (2018).

225 We also used RFID records to determine the exact age of fledging for each  
226 nestling in the population. For each individual nestling, we considered the latest record  
227 at the nest box to be the time of fledging. While it is possible that nestlings could leave  
228 and then return to the box, we saw no evidence for this behavior in our RFID data even

229 when the sensors were left running long after we had confirmed fledging. Occasionally,  
230 RFID units failed because of software problems or dead batteries and we are therefore  
231 missing some records from parts of the provisioning period or fledging times for some  
232 nestlings.

233

#### 234 *Feather Measurements*

235

236 We measured the density of feather barbs for adults and nestlings following the  
237 method developed by Butler et al. (2008) as described in Callan et al. (2019a), except that  
238 we modified their approach for use with photographs rather than measuring with a  
239 dissecting scope. To take photographs, we spread each feather on a microscope slide  
240 that had been covered in contrasting cardstock paper with a scale bar. We used black  
241 paper as a background when photographing white breast feathers and white paper  
242 when photographing brown, green, and blue rump feathers. The feather was pressed  
243 down flat with a second clear microscope slide and photographed using a digital  
244 camera with a macro lens held in place on a document-scanning platform with diffuse  
245 lights. The camera mount ensured that photographs were in sharp focus and always  
246 taken at a direct 90° angle from the slide surface to avoid parallax issues when  
247 measuring. For each individual, we photographed two breast and two rump feathers.

248 From the digital photographs, we measured the density of feather barbs using  
249 ImageJ (Schneider et al. 2012) . We first set the scale for each image using the scale bar  
250 that was included in every photograph. Next, we identified the section of the rachis to  
251 be measured and marked those points with the annotation tool in ImageJ. For the start  
252 point, we chose the most distal point on the feather rachis where a pennaceous barb  
253 could be seen branching off from the rachis. For the end point, we chose the most

254 proximal point on the rachis where pennaceous barbs could be clearly seen branching  
255 off of the rachis before becoming plumulaceous.

256 We next measured and recorded the length of the rachis between these two  
257 points using the segmented line tool. Finally, we counted the number of pennaceous  
258 barbs between the two points and recorded the left and right side barbs separately. We  
259 calculated a single barb density measure for the feather by dividing the average count  
260 of barbs from the two sides by the length of feather rachis and expressed density in  
261 terms of barbs per centimeter of rachis. We repeated this procedure for the two breast  
262 and two rump feathers and then averaged the two replicate measurements from each  
263 region together to arrive at a single breast density and rump density measurement.

264 We used multiple feathers from the same bird to estimate biological repeatability  
265 across feathers within a subject and multiple measurements of the same photograph by  
266 different observers to estimate inter-observer measurement repeatability. In some cases,  
267 we did not have complete measurements because we were missing feathers or had only  
268 a single feather. Feather measurements were also not available for any nestlings that did  
269 not survive to 15 days old.

270

### 271 *Determining Nest of Origin*

272

273 Adult and nestling blood samples were stored in lysis buffer (Seutin et al. 1991)  
274 in the field and DNA was extracted using Qiagen DNeasy Blood & Tissue Kit spin  
275 columns following the standard kit protocol. We amplified a set of 9 variable  
276 microsatellite loci that have been previously used in this population (Makarewich et al.  
277 2009; Hallinger et al. 2019). Our amplification protocol exactly followed that described  
278 in (Hallinger et al., 2019) and details on primer sequences, reaction volumes, cycling

279 conditions, and fragment analysis can be found there. We determined nest of origin by  
280 comparing nestlings to their putative mothers (the females from the 2-3 nests in each  
281 cross-fostering pair). Nestlings that matched only one putative mother at 8 of 9 loci  
282 were considered to have been laid by that female. Using these criteria, we were able to  
283 assign definitive genetic mothers to 275 of 313 sampled nestlings. The remaining 38  
284 nestlings were either missing blood samples, missing maternal genotype information,  
285 mismatched at more than two loci, or had two putative mothers that were so similar  
286 that the genetic mother could not be determined definitively. Those nestlings are  
287 excluded from all analyses that included nest of origin but included in summary  
288 statistics.

289

#### 290 *Data Analysis*

291

292 We assessed repeatability between observers and between multiple feathers from  
293 the same individual by estimating the intra-class correlation coefficient (ICC) in linear  
294 mixed models with no covariates as implemented by the 'rptR' package version 0.9.22  
295 in R (Stoffel et al. 2017). Overall differences in adult and nestling feather barb density  
296 measurements were assessed using linear mixed models with age (adult or nestling) as  
297 a fixed effect and nest as a random effect. To assess the extent to which environment  
298 (nest identity) and genetics (genetic mother) jointly contributed to variation in nestling  
299 feather barb density, we fit LMMs using the 'rptR' package that included random  
300 effects for both the nest identity and the genetic mother. We report the ICC for each of  
301 these effects as an estimate of the amount of variation explained by nest and genetic  
302 mother.

303 To evaluate the evidence for a trade-off between the speed of development and  
304 feather quality, we fit a series of models that included proxies of developmental pace as  
305 response variables (exact age at fledging, mass and morphological measurements on  
306 day 12 or 15). For fixed effects, these models included breast and back feather density, a  
307 categorical effect for the challenge treatment that the female received (control, handicap,  
308 or predator), and two-way interactions between feather density measurements and  
309 challenge treatment. For simplicity, we present reduced models that exclude  
310 interactions receiving no support. These models also included nest and genetic mother  
311 as random effects to account for the non-independence of nestlings from the same nest  
312 or mother.

313 Finally, we fit models to ask whether variation in female provisioning rate  
314 predicted nestling back or breast feather density (male provisioning was not considered  
315 because not all males had PIT tags). We first estimated standardized female  
316 provisioning rate by fitting a model of daily provisioning that included brood size,  
317 nestling age, a quadratic effect of nestling age, and random effects for the day of year  
318 (to account for weather differences) and nest identity (to account for repeated  
319 observations at each nest). We extracted a provisioning rate for each female from this  
320 model and standardized to a mean of 0 and standard deviation of 1. This standardized  
321 provisioning rate was then used as a predictor of nestling feather barb density in an  
322 LMM with nest identity and genetic mother included as random effects as described  
323 above.

324 All LMMs apart from those used to calculate ICC were fit with the 'lme4'  
325 package version 1.1-26 in R (Bates et al. 2015). Predictors were considered to be  
326 meaningful if the confidence interval did not cross zero. In tables presenting mixed  
327 model details, we also include p-values based on the Satterthwaite approximation as

328 implemented by ‘lmerTest’ version 3.1-3 (Kuznetsova et al. 2017). All figures and  
329 analyses were produced in R version 4.0.2 (R Core Development Team 2020).

330

## 331 RESULTS

332

333 In total, our analysis included 313 nestlings raised in 85 nests with at least one  
334 feather region measurement and 274 adults with at least one feather region  
335 measurement. In a validation dataset, inter-observer repeatability of barb density  
336 measurements from the same feather photograph was high ( $n = 149$  measurements of 38  
337 photographs by 8 observers; repeatability = 0.96; 95% CI = 0.94 to 0.98). Measurements  
338 of two independent feathers from the back or the breast of the same bird were also  
339 repeatable (breast:  $n = 1123$  measures of 572 individuals; repeatability = 0.78; CI = 0.74  
340 to 0.81; back:  $n = 1021$  measures of 572 individuals; repeatability = 0.68; CI = 0.63 to  
341 0.72).

342 Overall, there was a moderate positive correlation between barb density of back  
343 and breast feathers within an individual (Figure 2). This relationship was observed for  
344 both adults and nestlings with a similar slope in each group (Pearson’s correlation for  
345 adults and nestlings combined:  $r = 0.66$ , CI = 0.61 to 0.70; adults  $r = 0.34$ , CI = 0.23 to  
346 0.45; nestlings  $r = 0.24$ , CI = 0.13 to 0.35).

347 As expected, adults had substantially higher barb density for both back and  
348 breast feathers (Figure 2). For back feathers, nestlings had an overall barb density of  
349 17.9 barbs per cm, while adults had 24.3 barbs per cm (LMM with nest as a random  
350 effect,  $\beta$  for nestlings = -6.39, CI = -6.97 to -5.81). For breast feathers, nestlings had an  
351 overall barb density of 20.4 barbs per cm, while adults had 28.2 barbs per cm (LMM  $\beta$

352 for nestlings = -7.79, CI = -8.33 to -7.26). Thus, nestlings had on average 73.7 % (back)  
353 and 72.4 % (breast) of the barbs per cm as adults.  
354

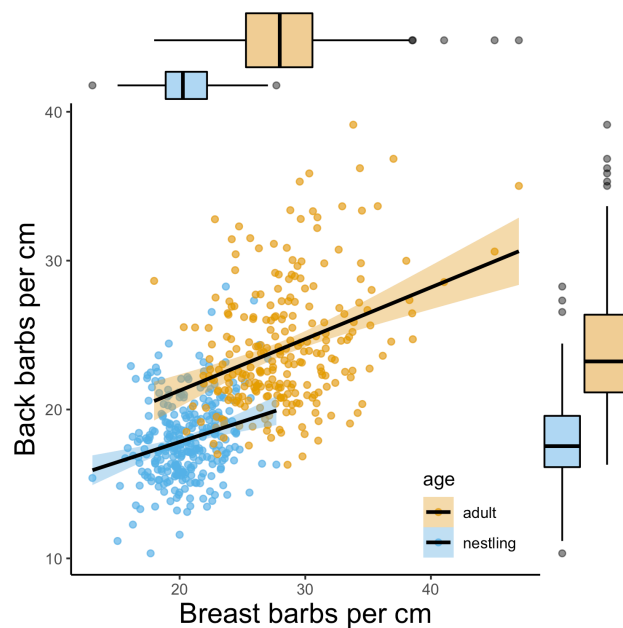

355

356

357 **Figure 2.** Relationship between breast and back barb density for feathers measured from the same individual for adults (orange)  
358 and nestlings (blue). Box and whisker plots in the margins show the distribution of barb density measurements for each body  
359 region and age group.

360

### 361 *Environmental and Genetic Influence on Barb Density*

362

363 For breast feathers, variation in nestling barb density was explained by both the  
364 genetic mother and the nest environment that a nestling was raised in. The adjusted  
365 ICC of nest environment controlling for genetic mother in an LMM was 0.33 (CI = 0.2 to  
366 0.442). The adjusted ICC of genetic mother controlling for nest environment in an LMM  
367 was 0.27 (CI = 0.14 to 0.39). For back feathers, genetic mother explained some variation  
368 in nestling barb density, but nest environment explained little. The adjusted ICC of



369 genetic mother for back feather barb measurements controlling for nest environment  
370 was 0.20 (CI = 0.05 to 0.34). The adjusted ICC of nest environment controlling for  
371 genetic mother was 0.07 (CI = 0.0 to 0.19).

372 For breast measurements, unadjusted ICC estimates were nearly identical, but  
373 for back measurements, unadjusted estimates were higher for both categories,  
374 suggesting that nest environment and genetic mother explained much of the same  
375 variation. Unadjusted ICC for genetic mother on back barbs was 0.26 (CI = 0.12 to 0.39)  
376 and for nest environment was 0.22 (CI = 0.08 to 0.34).

377

#### 378 *Barb Density by Time in the Nest*

379

380 Nestlings fledged an average of 22.6 days after hatching (standard deviation =  
381 1.5, range = 18 to 29 days). There was no apparent relationship between age at fledging  
382 and the density of feather barbs for either back or breast feathers (Figure 3). There was  
383 also no indication that the (lack of) relationship differed by treatment group (Table 1;  
384 unsupported interactions are not shown). However, there was a main effect of the  
385 predator treatment with nestlings from the predation treatment fledging at older ages  
386 than those from control or handicap nests. Nest identity explained much of the  
387 variation in fledging age and genetic mother explained little additional variation (Table  
388 1; marginal  $R^2$  for reduced model = 0.095, conditional  $R^2$  including random effects =  
389 0.657).

390

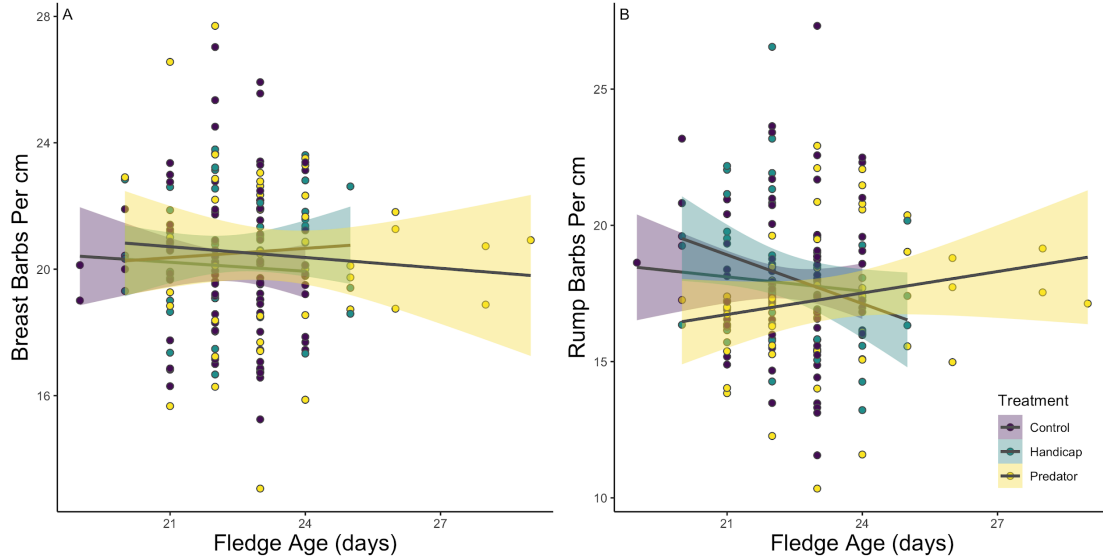

391  
 392 **Figure 3.** Fledging age was not related to breast (A) or back (B) feather barb density per cm for nestlings in the three different  
 393 treatment groups.

394  
 395 **Table 1.** Feather barb density and nest treatment as predictors of fledging age.

| <i>Predictors</i>                  | <b>Fledge Age (Days)</b> |               |                  |
|------------------------------------|--------------------------|---------------|------------------|
|                                    | <i>Estimates</i>         | <i>CI</i>     | <i>p</i>         |
| Intercept (Control)                | 22.40                    | 20.35 – 24.45 | <b>&lt;0.001</b> |
| Back Barb Density                  | 0.04                     | -0.04 – 0.11  | 0.328            |
| Breast Barb Density                | -0.04                    | -0.13 – 0.05  | 0.410            |
| Handicap                           | -0.06                    | -0.99 – 0.88  | 0.905            |
| Predator                           | 1.17                     | 0.33 – 2.02   | <b>0.006</b>     |
| <b>Random Effects</b>              |                          |               |                  |
| $\sigma^2$                         | 1.00                     |               |                  |
| $\tau_{00}$ Mother                 | 0.01                     |               |                  |
| $\tau_{00}$ Nest                   | 1.63                     |               |                  |
| ICC                                | 0.62                     |               |                  |
| $N_{\text{Nest}}$                  | 60                       |               |                  |
| $N_{\text{Mother}}$                | 75                       |               |                  |
| Observations                       | 177                      |               |                  |
| Marginal $R^2$ / Conditional $R^2$ | 0.095 / 0.657            |               |                  |

397  
 398  
 399 *Correlation Between Nestling Feather Barb Density and Morphology*

400

401 Breast feather barb density was positively related to day 12 and day 15 nestling  
402 mass, but only in the predator treatment group (Figure 4, Table 2). Back barb density  
403 was not related to nestling wing length, head plus bill length, or mass in any treatment  
404 group. Overall, nestlings raised in the predator treatment group had shorter wings on  
405 day 12 and lower mass on day 12 and 15 than did nestlings raised in either the handicap  
406 or control group (Table 2). However, the amount of variation in mass explained by  
407 feather measurements was small compared to that explained by random effects fitted  
408 for the nest environment and the genetic mother (Table 2; marginal  $R^2$  of main effects =  
409 0.02 to 0.09; conditional  $R^2$  including random effects = 0.32 to 0.70).  
410

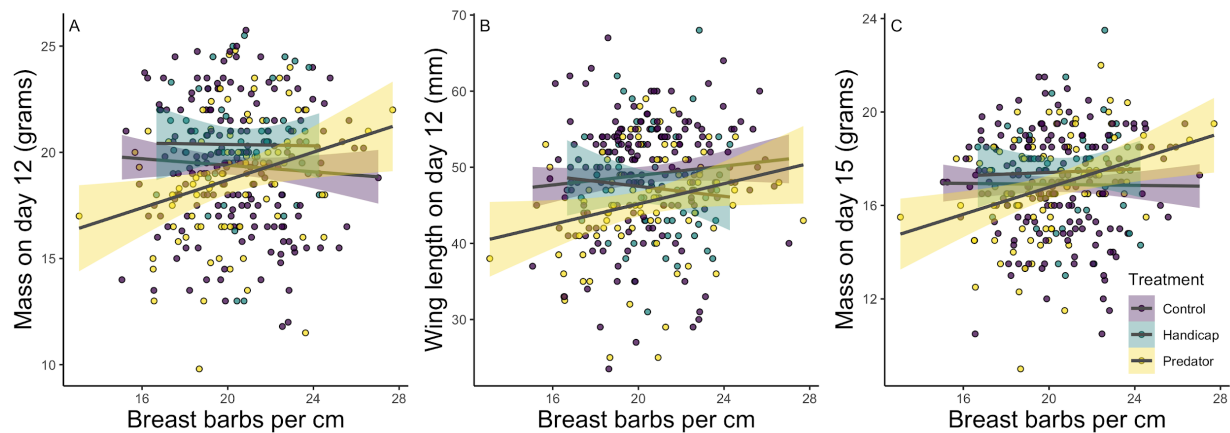

411  
412 **Figure 4.** Nestling mass on day 12 (A), flattened wing chord length on day 12 (B), and mass on day 15 (C) in relation to breast  
413 feather barb density by treatment group.

414  
415  
416 **Table 2.** Linear mixed models showing relationship between barb density and nestling morphology by treatment group. Genetic  
417 mother and nest of development are included as random effects.

| Predictors                                           | Day 12 Mass   |                |              | Day 12 Head + Bill |               |        | Day 12 Flat Wing |                |              | Day 15 Mass   |               |              |
|------------------------------------------------------|---------------|----------------|--------------|--------------------|---------------|--------|------------------|----------------|--------------|---------------|---------------|--------------|
|                                                      | Estimates     | CI             | p            | Estimates          | CI            | p      | Estimates        | CI             | p            | Estimates     | CI            | p            |
| Intercept                                            | 21.92         | 18.26 – 25.57  | <0.001       | 24.20              | 22.80 – 25.60 | <0.001 | 48.71            | 39.91 – 57.51  | <0.001       | 17.75         | 14.76 – 20.74 | <0.001       |
| Back Barb Density                                    | -0.04         | -0.14 – 0.07   | 0.495        | 0.01               | -0.04 – 0.06  | 0.813  | 0.05             | -0.20 – 0.30   | 0.677        | -0.02         | -0.11 – 0.07  | 0.649        |
| Breast Barb Density                                  | -0.10         | -0.26 – 0.06   | 0.221        | 0.03               | -0.03 – 0.09  | 0.281  | -0.03            | -0.42 – 0.35   | 0.864        | -0.03         | -0.16 – 0.11  | 0.711        |
| Handicap                                             | 3.43          | -4.55 – 11.41  | 0.399        | -0.03              | -0.55 – 0.49  | 0.913  | 7.73             | -11.30 – 26.75 | 0.426        | -0.69         | -7.24 – 5.87  | 0.838        |
| Predator                                             | -6.27         | -12.15 – -0.39 | <b>0.037</b> | -0.34              | -0.77 – 0.10  | 0.132  | -15.83           | -30.01 – -1.64 | <b>0.029</b> | -4.72         | -9.38 – -0.06 | <b>0.047</b> |
| Breast Barb * Handicap                               | -0.11         | -0.48 – 0.27   | 0.578        |                    |               |        | -0.40            | -1.29 – 0.49   | 0.376        | 0.07          | -0.24 – 0.38  | 0.674        |
| Breast Barb * Predator                               | 0.28          | 0.00 – 0.56    | <b>0.049</b> |                    |               |        | 0.53             | -0.14 – 1.21   | 0.122        | 0.23          | 0.01 – 0.46   | <b>0.041</b> |
| <b>Random Effects</b>                                |               |                |              |                    |               |        |                  |                |              |               |               |              |
| $\sigma^2$                                           | 3.35          |                |              | 0.99               |               |        | 18.47            |                |              | 2.50          |               |              |
| $\tau_{00}$                                          | 1.33          | Mother         |              | 0.02               | Mother        |        | 5.14             | Mother         |              | 0.72          | Mother        |              |
|                                                      | 3.61          | Nest           |              | 0.42               | Nest          |        | 33.02            | Nest           |              | 1.33          | Nest          |              |
| ICC                                                  | 0.60          |                |              | 0.31               |               |        | 0.67             |                |              | 0.45          |               |              |
| N                                                    | 84            | Nest           |              | 84                 | Nest          |        | 84               | Nest           |              | 82            | Nest          |              |
|                                                      | 90            | Mother         |              | 90                 | Mother        |        | 90               | Mother         |              | 89            | Mother        |              |
| Observations                                         | 290           |                |              | 290                |               |        | 288              |                |              | 286           |               |              |
| Marginal R <sup>2</sup> / Conditional R <sup>2</sup> | 0.048 / 0.615 |                |              | 0.020 / 0.320      |               |        | 0.085 / 0.702    |                |              | 0.031 / 0.467 |               |              |

418

419

420

421

422

423

424

425

426

427

428

After controlling for nestling age and brood size, female provisioning rate was not associated with nestling back feather barb density (LMM with nest and genetic mother as random effects; full model marginal R<sup>2</sup> = 0.008; effect of standardized provisioning rate = -0.26; CI = -0.66 to 0.15). However, a higher rate of female provisioning was associated with decreased nestling breast feather barb density (Figure 5, LMM full model marginal R<sup>2</sup> = 0.04; effect of provisioning rate = -0.49; CI = -0.87 to -0.10).

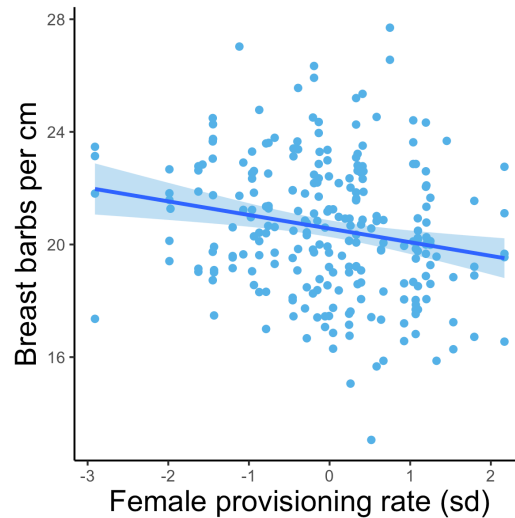

429

430 **Figure 5.** Nestling breast barbs per centimeter in relation to standardized female provisioning rate. Provisioning rate accounts for  
431 nestling age and brood size (see methods) and is shown in units of standard deviations.

432

## 433 **DISCUSSION**

434

435 Consistent with the idea that ephemeral traits may be deprioritized during  
436 development, we found that tree swallow nestlings grew body feathers that had lower  
437 barb density than those of adults from the same body regions. Individuals varied  
438 considerably in their barb density, but there was high repeatability within individuals  
439 for feathers from the same body region and a moderate association between feathers  
440 from different body regions. Cross fostering revealed that there was both a strong  
441 environmental and genetic basis to variation in feather barb density. Despite the fact  
442 that there was substantial variation in both feather quality and in the pace of  
443 development—measured as either the exact age of fledging or body size—we found no  
444 evidence for a within-individual resource allocation trade-off between feather quality  
445 and rapid development. Moreover, accounting directly for variation in resource  
446 acquisition by including maternal provisioning rates or experimental challenges on

447 parents did not reveal any hidden trade-off, as might be expected if variation in  
448 resource acquisition had masked allocation trade-offs (sensu van Noordwijk & de Jong,  
449 1986). In fact, higher female provisioning rates were associated with slightly lower  
450 feather quality and, among nestlings in a nest predation treatment group, there was a  
451 positive association between feather quality and body size measurements; these  
452 patterns are opposite to those predicted if reduced resources had forced differential  
453 investment in feathers versus growth. Our results highlight the difficulty of inferring  
454 individual level resource trade-offs from comparative data alone.

455         In a comparative study of feather barb density from nest-grown feathers  
456 including 123 species, Callan et al. (2019) found a strong relationship between time in  
457 the nest and feather quality (Figure 1A). Species that develop more rapidly in the nest  
458 have consistently lower quality feathers—as compared to adults of the same species—  
459 than do those that develop more slowly in the nest. The authors hypothesize that this  
460 relationship arises from a resource allocation trade-off, with species that must develop  
461 rapidly in order to leave the nest and avoid predation shunting resources away from  
462 other traits. They argue that these trade-offs may be especially apparent in ephemeral  
463 traits, like nest-grown feathers, because the fitness consequences of lower quality  
464 ephemeral traits are relatively low since they are quickly replaced after fledging. How  
465 can we resolve this evidence for an apparently strong trade-off between development  
466 and feather quality among species with the lack of evidence for a trade-off found within  
467 a single species in our study? Agrawal argues that often, “trade-offs at one level of  
468 organization will provide little insight into what may occur at other levels” (pg. 3;  
469 Agrawal, 2020) without additional consideration of the mechanism that generates trait  
470 associations. His review goes on to develop a conceptual framework for considering

471 what types of trait associations (or trade-offs) are likely to scale across levels or to only  
472 be apparent at a single level.

473         Interpreted in light of this framework, our results in tree swallows and the  
474 comparative results presented by Callan et al. (2019) are most consistent with the idea  
475 that the inter-specific association between rapid development and feather quality arises  
476 from adaptative specialization to different developmental strategies by each species,  
477 rather than from a direct resource allocation trade-off that plays out within species or  
478 individuals (Figure 1D). This is perhaps unsurprising given the nature of the proposed  
479 trade-off. Direct resource allocation trade-offs are most likely to arise with strong  
480 constraints and between life history traits that are directly associated with fitness when  
481 all else is held equal (Agrawal, 2020; Roff, 2002; Stearns, 1992). In contrast, negative trait  
482 associations among species often represent the outcome of adaptive specialization  
483 based on strategic optimization (Futuyma and Moreno 1988; Agrawal 2020). In the case  
484 of ephemeral feathers, the direct developmental costs of feather barbs may not be severe  
485 enough to generate a within species resource allocation trade-off and may not share a  
486 direct mechanistic link with the overall rate of development (e.g., a shared  
487 developmental pathway). Additionally, plastic responses are only favored when  
488 relevant information is available (Pigliucci 2005), and if nestlings cannot reliably assess  
489 their own developmental pace, there may be no realized benefit to modifying the  
490 allocation of resources to faster development over feathers. In contrast, when  
491 comparing different species, strong selection for particular developmental trajectories  
492 (e.g., fast fledging to avoid predation) may result in subsequent selection to optimize  
493 investment in secondary traits, such as ephemeral feather quality, without the need to  
494 invoke a direct allocation trade-off.

495           Alternatively, it is possible that some species do face direct resource allocation  
496 trade-offs between feather quality and developmental rate, but that tree swallows are  
497 not representative of a more general mechanism (Figure 1E). Several aspects of tree  
498 swallow life history might make them less likely to show this particular allocation  
499 trade-off. First, as cavity nesters, tree swallows experience relatively low predation rates  
500 and spend an unusually long time in the nest for their size (Winkler et al. 2020b), which  
501 may mitigate the need to redirect resources towards rapid development. Second, cold  
502 snaps create strong selection events for tree swallow nestlings because the parents are  
503 entirely dependent on flying insects (Winkler et al. 2013). When flying insects are scarce,  
504 parents travel far from the nest and are absent for long periods (Stocek 1986). These cold  
505 snaps can lead to mass mortality events for nestlings, but after feathers are grown  
506 nestlings are much less vulnerable because they can thermoregulate independently  
507 (Shipley et al., 2020). Thus, for tree swallows in particular, growing effective feathers in  
508 the nest might be especially important even when resources are scarce. It is possible that  
509 direct resource allocation trade-offs might be observed in other species that face  
510 different life history challenges.

511           We also found that feather barb density itself and morphological relationships  
512 with barb density differed for breast versus rump feathers. In general, breast feathers  
513 had higher barb density and were more clearly influenced by both nest environment  
514 and genetic mother; feathers from this body region were also the only ones that showed  
515 any relationship with nestling morphological measures. In adult tree swallows, feathers  
516 in both of these body regions are putative social signals, but their function and color  
517 patterns differ dramatically. Breast feathers are light gray to pure white and have been  
518 implicated in social signaling and aggression (Beck et al. 2015; Taff et al. 2019b). Rump  
519 feathers are brown to iridescent blue-green and have been associated with mate choice



520 and extrapair paternity in males (Bitton et al. 2007; Van Wijk et al. 2016; Whittingham  
521 and Dunn 2016). Adult female rump feathers go through a delayed plumage maturation  
522 with one year old females displaying brown feathers that turn iridescent blue-green in  
523 subsequent years and this process may also mediate social relationships and  
524 performance (Berzins and Dawson 2016; Dakin et al. 2016). We do not know at present  
525 whether the color of these patches has a function in fledgling tree swallows and, if so,  
526 how that might relate to barb density. From a thermoregulation perspective, the  
527 importance of breast and rump feathers may also differ. For nestlings huddling in a nest  
528 cup, the rump feathers are more directly exposed to ambient air, but the breast feathers  
529 insulate the pectoralis muscles, which is a major source of shivering thermogenesis in  
530 birds (West 1965). We also observed substantial variation in the age of feathering in  
531 between nestlings in our study; some nestlings had fully developed feathers across  
532 most of the body by day 15 while others had only small pin feathers. Because feathers  
533 are inert after exiting the follicle, the barb measurements we took from 15-day-old  
534 nestlings represent the influence of conditions experienced earlier in development. It  
535 seems likely that overall feathering is more important for thermoregulation than barb  
536 density *per se*, but we do not know at present whether the quality of individual feathers  
537 and overall rate of feather growth are mechanistically linked.

538         Although we did not find any evidence for an allocation trade-off, we did find  
539 that predator treatments resulted in an association between feather barb measurements  
540 and body size in some cases. In many species, experimentally increasing the perceived  
541 threat of predation leads to faster nestling development (LaManna and Martin 2016). In  
542 contrast, nestlings in our study fledged later when raised in a nest that experienced  
543 predation treatments. While we cannot be certain about the cause of this discrepancy, it  
544 seems likely that the details of our treatment may have contributed to the difference.

545 Because our predation treatments were targeted at adult females and occurred shortly  
546 before or after hatching, there was little or no opportunity for nestlings to directly  
547 perceive predator treatments. Rather, any perceived threat would have occurred  
548 through the indirect effect of subsequent parental behavior. In contrast, previous  
549 studies targeting nestlings have manipulated cues (e.g., auditory or visual  
550 presentations) that nestlings could perceive directly (Hallinger et al., 2019; LaManna &  
551 Martin, 2016). In our study, nestlings in the predation treatment group showed a  
552 positive correlation between body size and breast feather density (the opposite to that  
553 predicted if predation threat increased relative investment in growth or decreased  
554 acquisition of resources). There are two possible explanations for this pattern. First,  
555 parental behavior may have been altered in a way that impacted nestling  
556 developmental trajectories. While we did not observe differences in overall  
557 provisioning rate, parents may have changed brooding schedules, or the type or quality  
558 of food delivered to nestlings. Second, as a result of altered parental behavior, the  
559 feather relationships we observed in the predation group may be the result of  
560 differential survival to day 15 rather than changes in relative resource allocation.  
561 Because we only had feather measurements for nestlings that lived to day 15, we cannot  
562 assess whether differential survival contributed to the patterns that we observed. In  
563 either case, our results do not support a role for predation threat in revealing a hidden  
564 resource allocation trade-off between development and feather quality in tree swallows,  
565 although variation in predation risk is clearly an important driver of trait correlations in  
566 inter-specific comparisons (Callan et al. 2019a).

567 Our results highlight the fact that strong trait-correlations among species do not  
568 necessarily scale across levels of biological organization and that it is often difficult to  
569 infer within-species mechanisms from among species associations. Moving forward, we

570 suggest that more studies are needed that integrate measures of trait covariation within  
571 individuals and species with comparative analyses in order to parse the hierarchical  
572 nature of variation in trait correlations. These approaches are complementary: within-  
573 species measurements are needed to identify the proximate mechanisms producing trait  
574 correlations, while comparative studies are needed to understand how evolution has  
575 shaped population and species level strategies and to understand the conditions under  
576 which trade-offs represent strong constraints on life history evolution. Combining these  
577 approaches is a critical step towards developing a predictive framework for  
578 understanding when and why trait-associations do or do not scale across levels of  
579 biological organization.

580

#### 581 **ETHICAL NOTE**

582 We received approval for all of the procedures described here from the Cornell  
583 University Institutional Animal Care & Use Board (IACUC protocols # 2001-0051 and  
584 2019-0023). Sampling and capture in the field were approved by federal and state  
585 permits.

586

#### 587 **ACKNOWLEDGMENTS**

588

589 We thank the field and lab technicians who helped to collect data for this project,  
590 including Bashir Ali, Paige Becker, Raquel Castromonte, KaiXin Chen, Jeremy Collison,  
591 Alex Dopkin, Zapporah Ellis, Audrey Fox, Sungmin Ko, Raisa Kochmaruk, Christine  
592 Kallenberg, Brittany Laslow, Alex Lee-Papastavros, Jabril Mohammed, Yusol Park,  
593 Callum Poulin, Emma Regnier, Bella Somoza, and Kwame Tannis. We also thank  
594 Anurag Agrawal and Vanya Rohwer for comments on early versions of the manuscript.

595           Research funding was provided by NSF-IOS 1457251, a USDA Hatch Grant, and  
596   DARPA YFA D17AP00033 (to MNV). Support for BAJ, ATA, and AMR was provided  
597   by the Cornell Lab of Ornithology and NSF-REU funds. JLH and JJU were supported by  
598   NSF GRFP DGE-1650441.

599

## 600   **DATA AND CODE ACCESSIBILITY**

601           The complete dataset and code required to reproduce all analyses and figures is  
602   available on GitHub ([https://github.com/cct663/tres\\_feather\\_density](https://github.com/cct663/tres_feather_density)).

603

## 604   **AUTHOR CONTRIBUTION STATEMENT**

605           ATA, BAJ, CCT, and MNV contributed to the conceptualization of the study.  
606   AMR, ATA, BAJ, CCT, JJU, and JLH contributed to data collection. AMR, ATA, and  
607   BAJ, carried out measurements for the study. MNV contributed funding acquisition.  
608   CCT conducted analysis and visualization with input from all authors. CCT wrote the  
609   original draft of the manuscript with BAJ and with subsequent feedback and editing  
610   from all authors. All authors approved the final version of the manuscript.

611

612

## 613   **REFERENCES**

614

615   Agrawal, A. A. 2020. A scale-dependent framework for trade-offs, syndromes, and  
616   specialization in organismal biology. *Ecology* 101:e02924.

617   Bates, D., M. Maechler, B. Bolker, and S. Walker. 2015. Fitting linear mixed-effects models  
618   using lme4. *Journal of Statistical Software* 67:1–48.

- 619 Beck, M. L., W. A. Hopkins, and D. M. Hawley. 2015. Relationships among plumage coloration,  
620 blood selenium concentrations and immune responses of adult and nestling tree swallows. *J Exp*  
621 *Biol* 218:3415–3424.
- 622 Berzins, L. L., and R. D. Dawson. 2016. Experimentally altered plumage brightness of female  
623 tree swallows: a test of the differential allocation hypothesis. *Behaviour* 153:525–550.
- 624 Bitton, P.-P., E. L. O’Brien, and R. D. Dawson. 2007. Plumage brightness and age predict  
625 extrapair fertilization success of male tree swallows, *Tachycineta bicolor*. *Anim Behav* 74:1777–  
626 1784.
- 627 Bosque, C., and M. T. Bosque. 1995. Nest Predation as a Selective Factor in the Evolution of  
628 Developmental Rates in Altricial Birds. *The American Naturalist* 145:234–260.
- 629 Bridge, E. S., and D. N. Bonter. 2011. A low-cost radio frequency identification device for  
630 ornithological research. *Journal of Field Ornithology* 82:52–59.
- 631 Butler, L. K., S. Rohwer, and M. G. Speidel. 2008. Quantifying structural variation in contour  
632 feathers to address functional variation and life history trade-offs. *Journal of Avian Biology*  
633 39:629–639.
- 634 Callan, L. M., F. A. La Sorte, T. E. Martin, and V. G. Rohwer. 2019*a*. Higher Nest Predation  
635 Favors Rapid Fledging at the Cost of Plumage Quality in Nestling Birds. *The American*  
636 *Naturalist* 193:717–724.
- 637 ———. 2019*b*. Data from: Higher nest predation favors rapid fledging at the cost of plumage  
638 quality in nestling birds. *Dryad*.
- 639 Clinchy, M., M. J. Sheriff, and L. Y. Zanette. 2013. Predator-induced stress and the ecology of  
640 fear. *Functional Ecology* 27:56–65.
- 641 Dakin, R., A. Lendvai, J. Ouyang, I. Moore, and F. Bonier. 2016. Plumage colour is associated

- 642 with partner parental care in mutually ornamented tree swallows. *Anim Behav* 111:111–118.
- 643 Futuyma, D. J., and G. Moreno. 1988. The Evolution of Ecological Specialization. *Annual*  
644 *Review of Ecology and Systematics* 19:207–233.
- 645 Hallinger, K. K., M. N. Vitousek, and D. W. Winkler. 2019. Differences in perceived predation  
646 risk associated with variation in relative size of extra-pair and within-pair offspring. *J Evol Biol*  
647 33:282–296.
- 648 Kuznetsova, A., P. B. Brockhoff, and R. H. B. Christensen. 2017. “lmerTest” Package: Tests in  
649 Linear Mixed Effects Models. *Journal of Statistical Software* 82:0–32.
- 650 LaManna, J. A., and T. E. Martin. 2016. Costs of fear: behavioural and life-history responses to  
651 risk and their demographic consequences vary across species. *Ecology Letters* 19:403–13.
- 652 Makarewich, C. A., L. M. Stenzler, V. Ferretti, D. W. Winkler, and I. J. Lovette. 2009. Isolation  
653 and characterization of microsatellite markers from three species of swallows in the genus  
654 *Tachycineta*: *T. albilinea*, *T. bicolor* and *T. leucorrhoa*. *Molecular Ecology Resources* 9:631–  
655 635.
- 656 Martin, T. E. 1995. Avian Life History Evolution in Relation to Nest Sites, Nest Predation, and  
657 Food. *Ecological Monographs* 65:101–127.
- 658 Martin, T. E., E. Arriero, and A. Majewska. 2011. A trade-off between embryonic development  
659 rate and immune function of avian offspring is revealed by considering embryonic temperature.  
660 *Biology Letters* 7:425–428.
- 661 Martin, T. E., J. C. Oteyza, A. E. Mitchell, A. L. Potticary, and P. Lloyd. 2015. Postnatal Growth  
662 Rates Covary Weakly with Embryonic Development Rates and Do Not Explain Adult Mortality  
663 Probability among Songbirds on Four Continents. *The American Naturalist* 185:380–389.
- 664 Metcalfe, N., and P. Monaghan. 2003. Growth versus lifespan: perspectives from evolutionary

- 665 ecology. *Experimental gerontology* 38:935–940.
- 666 Pigliucci, M. 2005. Evolution of phenotypic plasticity: where are we going now? *Trends Ecol.*  
667 *Evol.* 20:481–486.
- 668 R Core Development Team. 2020. R: A language and environment for statistical computing,  
669 Vienna, Austria. R Foundation for Statistical Computing.
- 670 Remeš, V., and T. E. Martin. 2002. Environmental Influences on the Evolution of Growth and  
671 Developmental Rates in Passerines. *Evolution* 56:2505–2518.
- 672 Reznick, D., L. Nunney, and A. Tessier. 2000. Big houses, big cars, superfleas and the costs of  
673 reproduction. *Trends in Ecology & Evolution* 15:421–425.
- 674 Roff, D. A. 2002. *Life history evolution*. Sinauer Associates, Sunderland, MA.
- 675 Rohwer, S., L. Butler, and D. Froehlich. 2005. Ecology and demography of east-west differences  
676 in molt scheduling of Neotropical migrant passerines. Pages 87–105 *in* R. Greenberg and P.  
677 Marra, eds. *Birds of two worlds*. Johns Hopkins University Press, Baltimore.
- 678 Schneider, C. A., W. S. Rasband, and K. W. Eliceiri. 2012. NIH Image to ImageJ: 25 years of  
679 image analysis. *Nature Methods* 9:671–675.
- 680 Seutin, G., B. N. White, and P. T. Boag. 1991. Preservation of avian blood and tissue samples for  
681 DNA analyses. *Canadian Journal of Zoology* 69:82–90.
- 682 Shipley, J. R., C. W. Twining, C. C. Taff, M. N. Vitousek, A. Flack, and D. W. Winkler. 2020.  
683 Birds advancing lay dates with warming springs face greater risk of chick mortality. *Proceedings*  
684 *of the National Academy of Sciences* 117:25590–25594.
- 685 Stearns, S. C. 1992. *The evolution of life histories*. Oxford University Press, Oxford.
- 686 Stocck, R. 1986. Spring weather and local movements of tree swallows, *Tachycineta bicolor*.  
687 *Canadian Field Naturalist* 100:134–136.

688 Stoffel, M. A., S. Nakagawa, and H. Schielzeth. 2017. rptR: Repeatability estimation and  
689 variance decomposition by generalized linear mixed-effects models. *Methods in Ecology and*  
690 *Evolution* 8:1639–1644.

691 Taff, C. C., C. Zimmer, D. Scheck, T. A. Ryan, J. L. Houtz, M. R. Smee, T. A. Hendry, et al. In  
692 *Pressa*. Plumage manipulation alters the integration of social behavior, physiology, internal  
693 microbiome, and fitness. *Animal Behavior*.

694 Taff, C. C., C. Zimmer, and M. N. Vitousek. 2019*b*. Achromatic plumage brightness predicts  
695 stress resilience and social interactions in tree swallows (*Tachycineta bicolor*). *Behavioral*  
696 *Ecology* 30:733–745.

697 van Noordwijk, A. J., and G. de Jong. 1986. Acquisition and allocation of resources: their  
698 influence on variation in life history tactics. *American Naturalist* 128.

699 Van Wijk, S., A. Bourret, M. Bélisle, D. Garant, and F. Pelletier. 2016. The influence of  
700 iridescent coloration directionality on male tree swallows' reproductive success at different  
701 breeding densities. *Behav. Ecol. Sociobiol.* 70:1557–1569.

702 Vitousek, M. N., C. C. Taff, J. Stedman, C. Zimmer, D. R. Ardía, T. C. Salzman, and D. W.  
703 Winkler. 2018. The lingering impact of stress: brief acute glucocorticoid exposure has sustained,  
704 dose-dependent effects on reproduction. *Proc Roy Soc B* 285:20180722.

705 Weathers, W. W., and K. A. Sullivan. 1991. Growth and Energetics of Nestling Yellow-Eyed  
706 Juncos. *The Condor* 93:138–146.

707 West, G. C. 1965. Shivering and Heat Production in Wild Birds. *Physiological Zoology* 38:111–  
708 120.

709 Whittingham, L. A., and P. O. Dunn. 2016. Experimental evidence that brighter males sire more  
710 extra-pair young in tree swallows. *Mol Ecol* 25:3706–3715.



711 Winkler, D. W., K. K. Hallinger, D. R. Ardia, R. J. Robertson, B. J. Stutchbury, and R. R.  
712 Cohen. 2020a. Tree Swallow (*Tachycineta bicolor*), version 1.0. *in* A. F. Poole, ed. Birds of the  
713 World. Cornell Lab of Ornithology, Ithaca, NY, USA.

714 Winkler, D. W., K. K. Hallinger, T. M. Pegan, C. C. Taff, M. A. Verhoeven, D. C. van Oordt, M.  
715 Stager, et al. 2020b. Full lifetime perspectives on the costs and benefits of lay-date variation in  
716 tree swallows. *Ecology* 101:e03109.

717 Winkler, D. W., M. K. Luoa, and E. Rakhimberdiev. 2013. Temperature effects on food supply  
718 and chick mortality in tree swallows (*Tachycineta bicolor*). *Oecologia* 173:129–138.
